# Supplementary material for: Bronsted acid-type biosurfactant for heterocyclization: a green protocol for benzopyran synthesis
Source: Royal Society of Chemistry journal article supplement (doi:10.1039/c5ra13652k), 2015-01-01
Supplement: c5ra13652k1.pdf [file c5ra13652k1.pdf]

## Bronsted acid-type biosurfactant for heterocyclization: a green protocol for benzopyran synthesis

*Smita T. Morbale,<sup>a</sup> Swati D. Jadhav,<sup>a</sup> Madhukar B. Deshmukh,<sup>b</sup> Suresh S. Patil<sup>a\*</sup>*

<sup>a</sup>*Synthetic Research Laboratory, PG Department of Chemistry, P.D.V.P. College, Tasgaon, Dist.*

*Sangli,*

*India - 416312.*

<sup>b</sup>*Department of chemistry, Shivaji University, Kolhapur-416 004, India.*

\*Email: [sanyujapatil@yahoo.com](mailto:sanyujapatil@yahoo.com)

### Supporting Information

|                                                                                                         |          |
|---------------------------------------------------------------------------------------------------------|----------|
| General procedure for benzopyran formation.....                                                         | S1       |
| Spectroscopic data for products.....                                                                    | S2 – S15 |
| <sup>1</sup> H NMR, <sup>13</sup> C spectra of the benzopyran products .....                            | S16-S29  |
| Determination of Critical micellar concentration (CMC) of lemon extract by conductivity method<br>----- | S30-S31  |

#### **-S1-**

General: All chemicals were commercially sourced from Sigma Aldrich and used without further purification. Melting points were determined on DBK programmable melting point apparatus and are uncorrected. Infrared spectra were measured with a Bruker FT-IR spectrophotometer. <sup>1</sup>H NMR and <sup>13</sup>C NMR spectra were recorded on a Bruker AC (300 MHz for <sup>1</sup>H NMR and 300 MHz for <sup>13</sup>C NMR) spectrometer using CDCl<sub>3</sub> as solvent. Chemical shifts are expressed in δ parts per million (ppm) values with tetramethylsilane (TMS) as the internal reference and coupling constants are expressed in Hertz (Hz). Mass spectra were recorded on Shimadzu (QP 2010 GCMS). Equiptronics (Model EQ-664A) digital auto ranging conductivity meter was used for the measurement of critical micellar concentration. Optical micrograph was taken using ordinary light microscope (Leica DM 2000) under 100x magnifications.

**Typical procedure for synthesis of 9-(2-hydroxy-4,4-dimethyl-6-oxo-cyclohex-1-enyl)-3,3-dimethyl-2,3,4,9-tetrahydroxanthren-1-one:**

In a 25 mL round bottom flask, salicylaldehyde (1.1 mmol), 5,5-dimethyl 1,3-cyclohexanedione (2.2 mmol) were placed in lemon extract:water (6 mL, 1:1, v/v) and reaction mixture was stirred at 80°C temperature in preheated oil-bath till the completion of reaction as indicated by TLC (ethylacetate:hexane 4:6). The solid products was separated by simple filtration through a Buckner funnel, washed with cold water, and recrystalyzed from 96% ethanol (5 mL). The identity of the compound was ascertained on the basis of <sup>1</sup>H NMR, <sup>13</sup>C NMR, and FT-IR spectroscopy.

**-S2-**

**9-(2-Hydroxy-4,4-dimethyl-6-oxo-cyclohex-1-enyl)-3,3-Dimethyl-2,3,4,9-tetrahydroxanthen-1-one (Table 3,Entry 1)**

Yield: 85 %; mp 215–218 °C; <sup>1</sup>H NMR (300 MHz, CDCl<sub>3</sub>): d 10.50(s, 1H, -OH), 7.08–7.16 (m, 1H, Ar-H), 6.93–7.01 (m, 3H, Ar-H), 4.65 (s, 1H, -CH), 2.54 (q, J=17.7, 20.0 Hz, 2H, -CH<sub>2</sub>), 2.35 (s, 2H, -CH<sub>2</sub>), 2.30(s, 2H, -CH<sub>2</sub>), 1.93 (q, J=6.0, 16.4 Hz, 2H, -CH<sub>2</sub>), 1.14 (s, 3H, -CH<sub>3</sub>), 1.03 (s, 3H, -CH<sub>3</sub>), 1.00 (s, 6H, 2-CH<sub>3</sub>); <sup>13</sup>C NMR (300 MHz, CDCl<sub>3</sub>): d 200.40, 196.13, 170.53, 168.78, 151.04, 127.98, 127.52, 124.53, 118.31, 115.78, 111.07, 96.20, 50.58, 49.93, 43.24, 41.60, 32.33, 31.02, 29.85, 29.43, 27.79, 27.21,26.42; IR (cm<sup>-1</sup>): 3153, 2958, 1622, 1488, 1376, 1312, 1233, 1185, 1151, 1077, 1019, 762, 655, 582, 475; MS : 367 (M + 1), 389 (M + Na). Anal. calcd. for C<sub>23</sub>H<sub>26</sub>O<sub>4</sub>: C, 75.38; H, 7.15; O, 17.46. Found: C, 75.33; H, 7.15; HRMS m/z calcd. for C<sub>23</sub>H<sub>26</sub>O<sub>4</sub>: 366.0000, found 367.1918(M+H), 389.1737 (M+Na).

**-S3-**

**3-methoxy-9-(2-hydroxy-4,4-dimethyl-6-oxo-cyclohex-1-enyl)-3,3-dimethyl-2,3,4,9-tetrahydro-xanthen-1-one (Table 3,Entry 2)**

Yield: 80 %; mp 224-227 °C; <sup>1</sup>H NMR (300 MHz, CDCl<sub>3</sub>): d 10.50 (s, 1H, -OH), 7.08–7.21 (m, 1H, Ar-H), 6.93–7.01 (m, 3H, Ar-H), 4.63 (s, 1H, -CH), 2.54 (q, J=17.7, 20.0 Hz, 2H, -CH<sub>2</sub>), 2.35 (s, 2H, -CH<sub>2</sub>), 2.30 (s, 2H, -CH<sub>2</sub>), 1.93 (q, J=6.0, 16.4 Hz, 2H, -CH<sub>2</sub>), 3.88 (s, 1H, -OCH<sub>3</sub>) , 1.14(s, 3H, -CH<sub>3</sub>), 0.93 (s, 9H, 3CH<sub>3</sub>); <sup>13</sup>C NMR (300 MHz, CDCl<sub>3</sub>): 200.40, 196.521, 170.554, 168.800, 147.081, 140.658, 125.203, 124.203, 119.760, 118.149, 110.887, 110.370, 56.058, 50.623, 49.930, 43.167, 41.533, 32.288, 30.887, 29.852, 29.051, 27.755 , 27.162, 26.421.

**-S3-**

-S4-

**7-Bromo-9-(2-hydroxy-4,4-dimethyl-6-oxo-cyclohex-1-enyl)-3,3-dimethyl-2,3,4,9-tetrahydro-xanthen-1-one (Table 3,Entry 3)**

Yield: 92 %; mp 248-251°C; <sup>1</sup>H NMR (300 MHz, CDCl<sub>3</sub>): d 10.15 (s, 1H, -OH), 7.21–7.24 (dd, J=1.9, 6.8 Hz, 1H, Ar-H), 7.08 (s, 1H, Ar-H), 6.87 (d, J=8.7 Hz, 1H, Ar-H), 5.02 (s, 1H, -CH-), 2.28–2.59 (m, 6H, 3-CH<sub>2</sub>), 1.95 (s, 2H, -CH<sub>2</sub>), 1.33 (s, 3H, -CH<sub>3</sub>), 0.99–1.05 (m, 9H, 3-CH<sub>3</sub>); <sup>13</sup>C NMR (300 MHz, CDCl<sub>3</sub> + DMSO): d 195.65, 164.328, 148.794, 130.563, 129.103, 127.741, 116.932, 115.413, 110.34, 50.27, 40.65, 40.33, 40.05, 39.78, 39.22, 38.94, 38.66, 31.35, 31.27, 28.93, 27.56, 26.30; IR (cm<sup>-1</sup>): 3103, 2963, 1618, 1475, 1374, 1302, 1231, 1178, 1075, 1037, 884, 817, 657, 590, 478; MS : 445 (M<sup>+</sup>), 447 (M+2). Anal. calcd. for C<sub>23</sub>H<sub>25</sub>BrO<sub>4</sub>: C, 62.03; H, 5.66; Br, 17.94; O, 14.37. Found: C, 62.03; H, 5.65. HRMS m/z calcd for: C<sub>23</sub>H<sub>25</sub>BrO<sub>4</sub>: 445.0000, found 445.1003 (M)<sup>+</sup>.

-S5-

**7-Chloro-9-(2-hydroxy-4,4-dimethyl-6-oxo-cyclohex-1-enyl)-3,3-dimethyl-2,3,4,9-tetrahydro-xanthen-1-one (Table 3,Entry 5)**

Yield: 91 %; mp 232–234 °C; <sup>1</sup>H NMR (300 MHz, CDCl<sub>3</sub>): d 10.50 (s, 1H, -OH), 7.09 (dd, J=2.2, 2.6 Hz, 1H, Ar-H), 6.91–6.97 (m, 2H, Ar-H), 4.61 (s, 1H, -CH), 2.52 (q, J= 17.3, 18.5 Hz, 2H, -CH<sub>2</sub>), 2.37 (d, J=4.9 Hz, 2H, -CH<sub>2</sub>), 2.30 (s, 2H, -CH<sub>2</sub>), 1.96 (s, 2H, -CH<sub>2</sub>), 1.14 (s, 3H, -CH<sub>3</sub>), 1.00–1.05 (m, 9H, 3-CH<sub>3</sub>); IR (cm<sup>-1</sup>): 3102, 2965, 2710, 1624, 1571, 1476, 1374, 1301, 1233, 1179, 1077, 1038, 1015, 879, 819, 657, 618, 591, 549, 469; MS : 401 (M<sup>+</sup>), 403 (M+2). Anal. calcd. for C<sub>23</sub>H<sub>25</sub>ClO<sub>4</sub>: C, 68.91; H, 6.29; Cl, 8.84; O, 15.96. Found: C, 68.89; H, 6.24. HRMS m/z calcd. for C<sub>23</sub>H<sub>25</sub>ClO<sub>4</sub>: 400.0000, found 401.1529 (M + H), 423.1328 (M + Na).

-S6-

**5-Bromo-7-chloro-9-(2-hydroxy-4,4-dimethyl-6-oxo-cyclohex-1-enyl)-3,3-dimethyl-2,3,4,9-tetrahydro-xanthen-1-one (Table 3,Entry 6 )**

Yield: 90 %; mp 241-243 °C; <sup>1</sup>H NMR (300 MHz, CDCl<sub>3</sub>): d 10.34 (s, 1H, -OH), 7.36 (d, J=2.2 Hz, 1H, Ar-H), 6.90 (d, J=2.0 Hz, 1H, Ar-H), 4.60 (s, 1H, -CH), 2.62 (q, J=17.7, 18.5 Hz, 2H, -CH<sub>2</sub>), 2.38 (d, J=4.5 Hz, 2H, -CH<sub>2</sub>), 2.31 (s, 2H, -CH<sub>2</sub>), 1.97 (s, 2H, -CH<sub>2</sub>), 1.16 (s, 3H, -CH<sub>3</sub>), 1.00–1.05 (m, 9H, 3-CH<sub>3</sub>); <sup>13</sup>C NMR (300 MHz, CDCl<sub>3</sub>): d 196.47, 195.10, 163.43, 144.77, 128.68, 127.79, 127.41,

126.35, 112.78, 109.93, 108.78, 94.79, 49.58, 49.03, 39.81, 30.77, 28.24, 26.92, 26.03, 25.64, 25.17; IR (cm<sup>-1</sup>): 3184, 2940, 1647, 1599, 1452, 1375, 1313, 1257, 1207, 1183, 1150, 1017, 887, 855, 803, 722, 662, 587, 475; MS: 479 (M<sup>+</sup>), 481 (M+2). Anal. calcd. for C<sub>23</sub>H<sub>24</sub>BrClO<sub>4</sub>: C, 57.58; H, 5.04; Br, 16.65; Cl, 7.39; O, 13.34. Found: C, 57.57; H, 5.04; HRMS m/z calcd. for C<sub>23</sub>H<sub>23</sub>ClBrO<sub>4</sub>: 478.0000, found 479.0618 (M + H), 481.0602 (M + 2), 501.0421 (M + Na), 503.0415 (M + Na + 2)

**-S7-**

**9-(2-Hydroxy-6-oxo-cyclohex-1-enyl)-2,3,4,9-tetrahydro-xanthen-1-one (Table 3, Entry 7)**

Yield: 87 %; mp 240-243 °C; <sup>1</sup>H NMR (300 MHz, CDCl<sub>3</sub>): δ 10.00 (s, 1H, -OH), 6.80–7.14 (m, 4H, Ar-H), 4.84 (s, 1H, -CH), 1.60–2.40 (m, 12H, 6-CH<sub>2</sub>); IR (cm<sup>-1</sup>): 2951, 2538, 1830, 1641, 1553, 1485, 1421, 1372, 1294, 1235, 1192, 1142, 1071, 993, 924, 850, 773, 564, 493 MS : 311 (M+1). Anal. calcd. for C<sub>19</sub>H<sub>18</sub>O<sub>4</sub>: C, 73.53; H, 5.85; O, 20.62. Found: C, 73.52; H, 5.84; HRMS m/z calcd. for C<sub>19</sub>H<sub>18</sub>O<sub>4</sub>: 310.0000, found 311.1295 (M + H), 333.1081 (M + Na).

**-S8-**

**7-Bromo-9-(2-hydroxy-6-oxo-cyclohex-1-enyl)-2,3,4,9-tetrahydro-xanthen-1-one (Table 3, Entry 9)**

Yield: 88 %; mp 238-240 °C; <sup>1</sup>H NMR (300 MHz): δ 10.75 (s, 1H, -OH), 7.25 (d, J=3.0 Hz, 1H, Ar-H), 7.09 (d, J=2.2 Hz, 1H, Ar-H), 6.89 (dd, J=5.2, 6.0 Hz, 1H, Ar-H), 4.57 (s, 1H, -CH), 1.76–2.85 (m, 12H, 6-CH<sub>2</sub>); <sup>13</sup>C NMR (300 MHz, CDCl<sub>3</sub>) : 202.18, 193.99, 167.43, 166.15, 148.45, 129.74, 129.28, 128.61, 126.86, 116.51, 116.10, 115.09, 47.57, 35.57, 35.02, 33.26, 26.02, 22.80, 18.95; IR (cm<sup>-1</sup>): 3105, 2955, 1640, 1596, 1477, 1374, 1279, 1233, 1186, 1144, 1070, 981, 819, 763, 620, 530, 470; MS : 389 (M<sup>+</sup>) 391 (M + 2); Anal. calcd. For C<sub>19</sub>H<sub>17</sub>BrO<sub>4</sub>: C, 58.63; H, 4.40; Br, 20.53; O, 16.44, found: C, 58.63; H, 4.39; HRMS m/z calcd. for C<sub>19</sub>H<sub>17</sub>BrO<sub>4</sub>: 389.0000, found 391.0551 (M + 2).

**-S9-**

**7-Chloro-9-(2-hydroxy-6-oxo-cyclohex-1-enyl)-2,3,4,9-tetrahydro-xanthen-1-one (Table 3, Entry 11)**

Yield: 94 %; mp 242-244 °C; <sup>1</sup>H NMR (500 MHz, CDCl<sub>3</sub>): δ 10.76 (s, 1H, -OH), 7.09 (d, J=6.3 Hz, 1H, Ar-H), 6.91–6.96 (m, 2H, Ar-H), 4.57 (s, 1H, -CH), 1.77–2.81 (m, 12H, 6-CH<sub>2</sub>); <sup>13</sup>C NMR (300 MHz, CDCl<sub>3</sub>+DMSO-d<sub>6</sub>): 201.86, 193.94, 167.23, 165.96, 147.56, 127.13, 126.76, 125.61, 124.53,

115.52, 110.65, 99.74, 47.08, 35.47, 34.82, 33.05, 26.35, 22.69, 19.03; IR (cm<sup>-1</sup>): 3110, 2954, 1645, 1596, 1477, 1416, 1375, 1280, 1239, 1188, 1141, 1068, 984, 917, 824, 576, 460; MS : 345 (M<sup>+</sup>), 347 (M + 2). Anal. calcd. for C<sub>19</sub>H<sub>17</sub>ClO<sub>4</sub>: C, 66.19; H, 4.97; Cl, 10.28; O, 18.56, found: C, 66.18; H, 4.97.

**-S10-**

**5-Bromo-7-chloro-9-(2-hydroxy-6-oxo-cyclohex-1-enyl)-2,3,4,9-tetrahydro-xanthen-1-one (Table 3, Entry 12)**

Yield: 91 %; mp 238–240 °C; <sup>1</sup>H NMR (300MHz, CDCl<sub>3</sub>): d 10.44 (s, 1H, -OH), 7.30 (d, J=2.6 Hz, 1H, Ar-H), 6.95 (d, J=1.7 Hz, 1H, Ar-H), 5.04 (s, 1H, -CH), 1.93–2.12 (m, 4H, 2-CH<sub>2</sub>), 2.25–2.51 (m, 8H, 4CH<sub>2</sub>); <sup>13</sup>CNMR (300MHz, CDCl<sub>3</sub>): 195.44, 163.90, 145.45, 129.31, 128.72, 127.93, 110.62, 109.50, 50.29, 40.33, 40.05, 39.77, 39.50, 39.2, 38.94, 38.76, 31.45, 31.3, 28.97, 27.56, 26.69, 26.20, 25.75 29; IR (cm<sup>-1</sup>): 49, 2887, 2526, 1651, 1560, 1452, 1363, 1279, 1245, 1185, 1133, 1063, 1007, 857, 765, 707, 538, 500, 438; MS: 423 (M<sup>+</sup>), 425 (M+2) Anal. calcd. for C<sub>19</sub>H<sub>16</sub>BrClO<sub>4</sub>: C, 53.86; H, 3.81; Br, 18.86; Cl, 8.37; O, 15.11, found: C, 53.85; H, 3.81.

**-S11-**

**5-methoxy-2,3-Dihydro-9-(2-hydroxy-5-oxocyclopent-1-enyl)-cyclopenta[*b*]chromen-1(9H)-one (Table 3, Entry 14 )**

Yield: 84 %; mp 257-260 °C; <sup>1</sup>H NMR (300 MHz DMSO): 2.29~2.36 (m, 6H, 3CH<sub>2</sub>), 2.72~2.74 (m, 2H, CH<sub>2</sub>), 3.82 (s, 3H, CH<sub>3</sub>O), 4.58 (s, 1H, CH), 6.58~6.60 (m, 1H, ArH), 6.92 (dd, J = 8.0 Hz, J = 1.2 Hz, 1H, ArH), 6.99~7.03 (m, 1H, ArH), 11.80 (b, 1H, OH); IR (cm<sup>-1</sup>): 3438, 3024, 2971, 2939, 1682, 1637, 1579, 1480, 1445, 1380, 1322, 1273, 1255, 1237, 1170, 1125, 1076, 825, 788, 739, 716.

**-S12-**

**7-Bromo-2,3-dihydro-9-(2-hydroxy-5-oxocyclopent-1-enyl)cyclopenta[*b*]chromen-1(9H)-one (Table 3, Entry 15)**

Yield: 86 %; mp 280-282°C; <sup>1</sup>H NMR (300 MHz DMSO): 2.26~2.43 (m, 6H, 3CH<sub>2</sub>), 2.56~3.34 (m, 2H, CH<sub>2</sub>), 5.01 (s, 1H, CH), 7.01~7.24 (m, 2H, ArH), 7.27 (d, J = 8.4 Hz, 1H, ArH), 10.60 (b, 1H, OH); IR (cm<sup>-1</sup>): 3505, 2932, 2910, 1699, 1653, 1585, 1474, 1383, 1276, 1259, 1240, 1198, 1160, 1126, 1071, 1018, 818, 707, 659.

**-S13-**

**7-nitro-2,3-Dihydro-9-(2-hydroxy-5-oxocyclopent-1-enyl)cyclopenta[*b*]chromen-1(9*H*)-one**

**(Table 3, Entry 16)**

Yield: 89 %; mp 265-268 °C; <sup>1</sup>H NMR (300 MHz DMSO): 2.34~2.41 (m, 6H, 3CH<sub>2</sub>), 2.74~2.76 (m, 2H, CH<sub>2</sub>), 4.72(s, 1H, CH), 7.41 (d, *J* = 8.8 Hz, 1H, ArH), 7.87 (d, *J* = 2.4 Hz, 1H, ArH), 8.11 (dd, *J* = 8.8 Hz, *J* = 2.4 Hz, 1H, ArH), 12.06 (b, 1H, OH). IR (cm<sup>-1</sup>): 3512, 2943, 2926, 1698, 1656, 1581, 1528, 1481, 1458, 1379, 1277, 1253, 1168, 1134, 1020, 929, 912, 840, 805, 748, 666.

**-S14-**

**7-Chloro-2,3-dihydro-9-(2-hydroxy-5-oxocyclopent-1-enyl)cyclopenta[*b*]chromen-1(9*H*)-one**

**(Table 3, Entry 17)**

Yield: 90 %; mp 271-273 °C; <sup>1</sup>H NMR (300 MHz DMSO): 2.33~2.38 (m, 6H, 3CH<sub>2</sub>), 2.71~2.73 (m, 2H, CH<sub>2</sub>), 4.60(s, 1H, CH), 7.01 (dd, *J* = 2.4 Hz, *J* = 1.2 Hz, 1H, ArH), 7.18 (d, *J* = 8.8 Hz, 1H, ArH), 7.27~7.30 (m, 1H, ArH), 12.00 (b, 1H, OH); IR (cm<sup>-1</sup>): 3508, 2935, 2914, 1699, 1654, 1583, 1477, 1409, 1384, 1277, 1259, 1240, 1162, 1126, 1018, 819, 677.

**-S15-**

**7,8-h-ph-9-(2-hydroxy-4,4-dimethyl-6-oxocyclohex-1-enyl)-3,3-dimethyl-2,3,4,9-tetrahydro-1*H*-xanthen-1-one (3h) (Table 4, Entry 1)**

Yield: 95 % mp 235-237 °C. <sup>1</sup>H NMR (300 MHz, CDCl<sub>3</sub>) δ = 10.70 (s, 1H, OH), 7.78 (d, 1H, ArH), 7.73 (d, 2H, ArH), 7.48 (t, 1H, ArH), 7.39 (t, 1H, ArH), 7.27 (d, 1H, ArH), 5.27 (s, 1H, CH), 2.68 (AB<sub>q</sub>, *J* = 17.6 Hz, 1H, CH<sub>2</sub>), 2.57 (AB<sub>q</sub>, *J* = 17.6 Hz, 1H, CH<sub>2</sub>), 1.96 (AB<sub>q</sub>, *J* = 16.4 Hz, 1H, CH<sub>2</sub>), 1.83 (AB<sub>q</sub>, *J* = 16.4 Hz, 1H, CH<sub>2</sub>), 2.36-2.41 (m, 4H, 4CH<sub>2</sub>), 1.17 (s, 3H, CH<sub>3</sub>), 1.08 (s, 3H, CH<sub>3</sub>), 0.95 (s, 3H, CH<sub>3</sub>), 0.72 (s, 3H, CH<sub>3</sub>) ppm; <sup>13</sup>C NMR (300 MHz, CDCl<sub>3</sub>) δ = 201.11, 196.85, 170.22, 169.09, 148.89, 131.26, 130.96, 158.54, 128.50, 126.71, 124.64, 122.87, 117.68, 116.59, 116.14, 111.08, 50.71, 49.98, 43.18, 41.37, 32.42, 30.62, 29.92, 29.33, 27.10, 26.37, 25.38 ppm; IR (KBr): 3182, 2941, 2862, 1643, 1593, 1464, 1373, 1315, 1261, 1235, 1061, 1026, 888, 813 cm<sup>-1</sup>.

R.NO. 22503

4  
1H IN CDCL3  
AVANCE-300

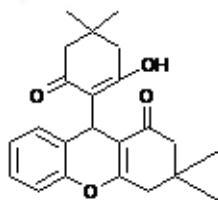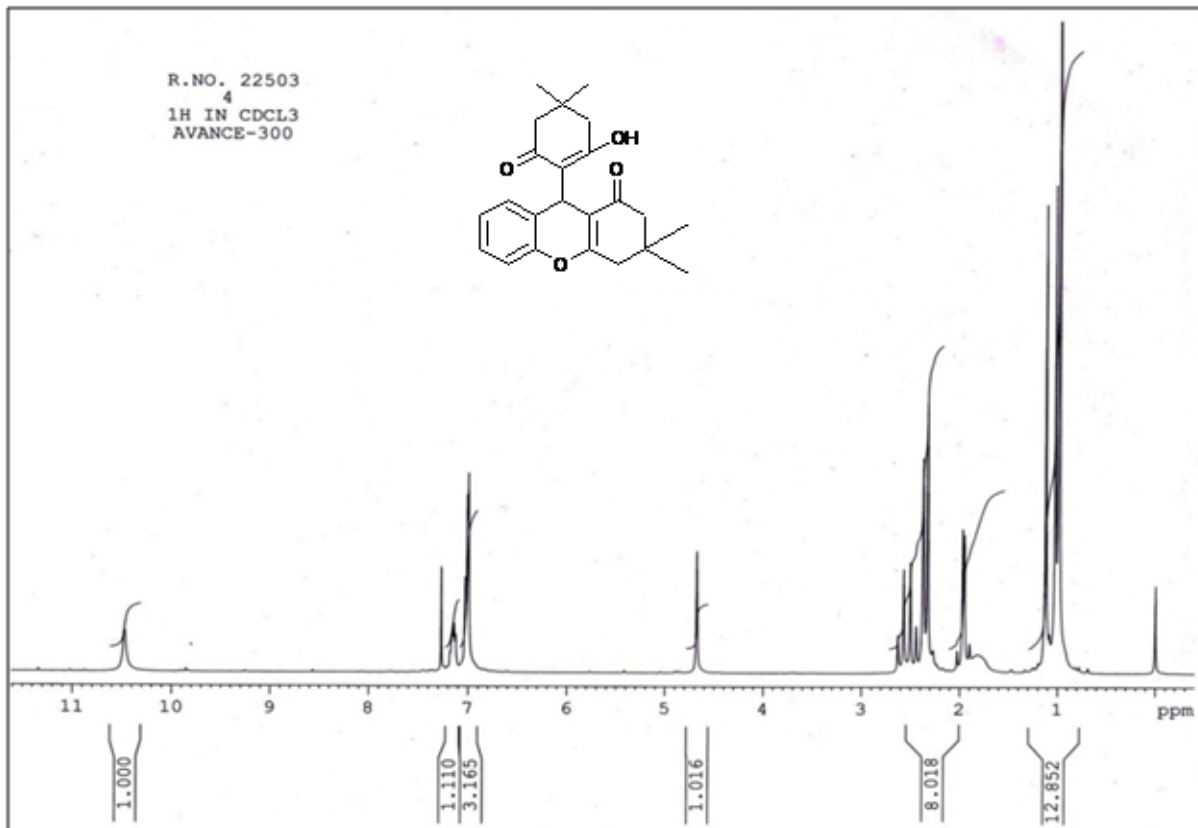

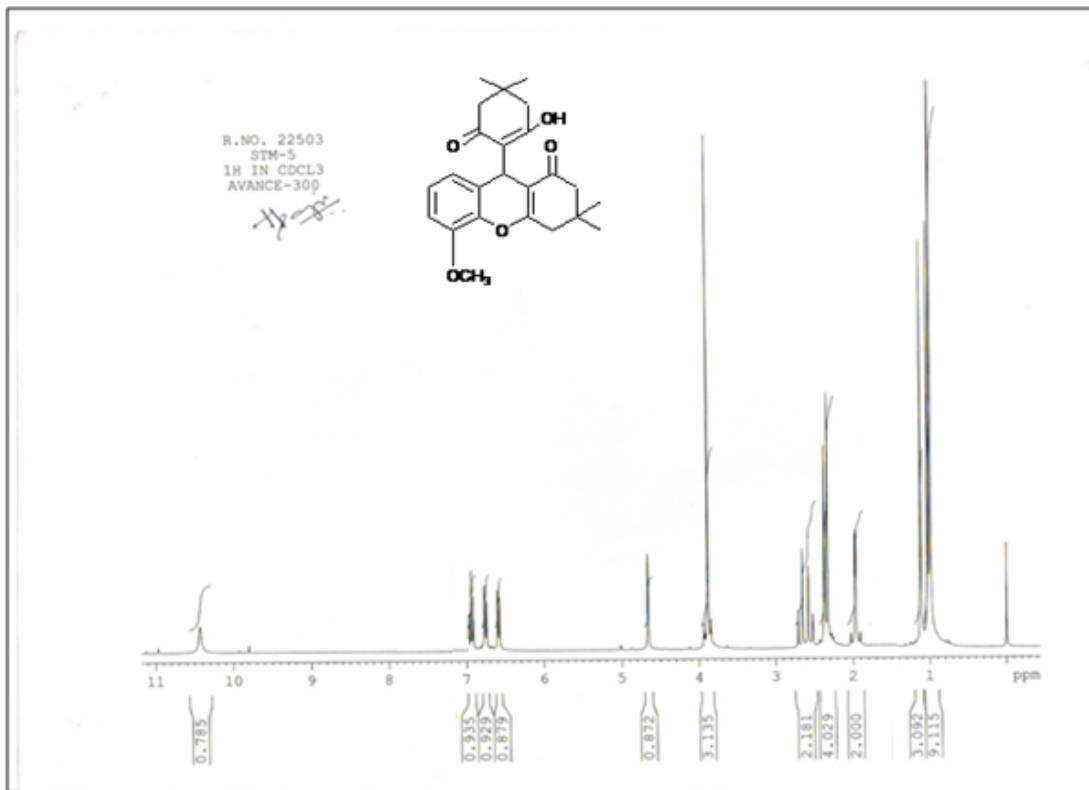



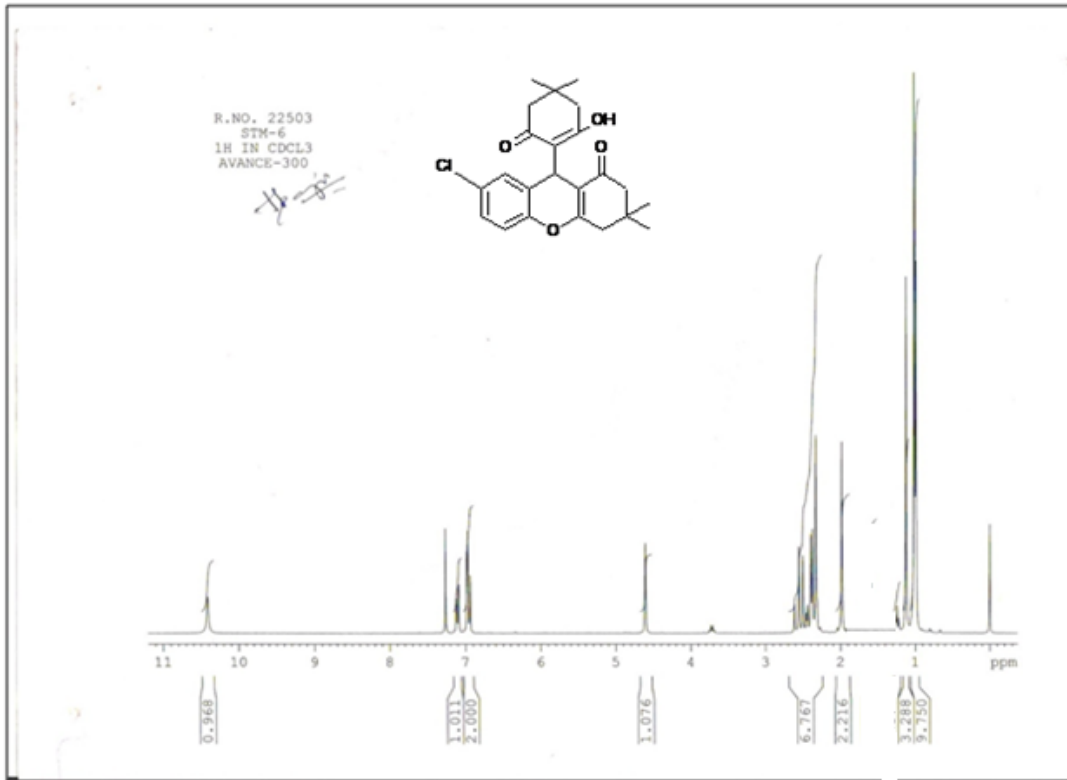

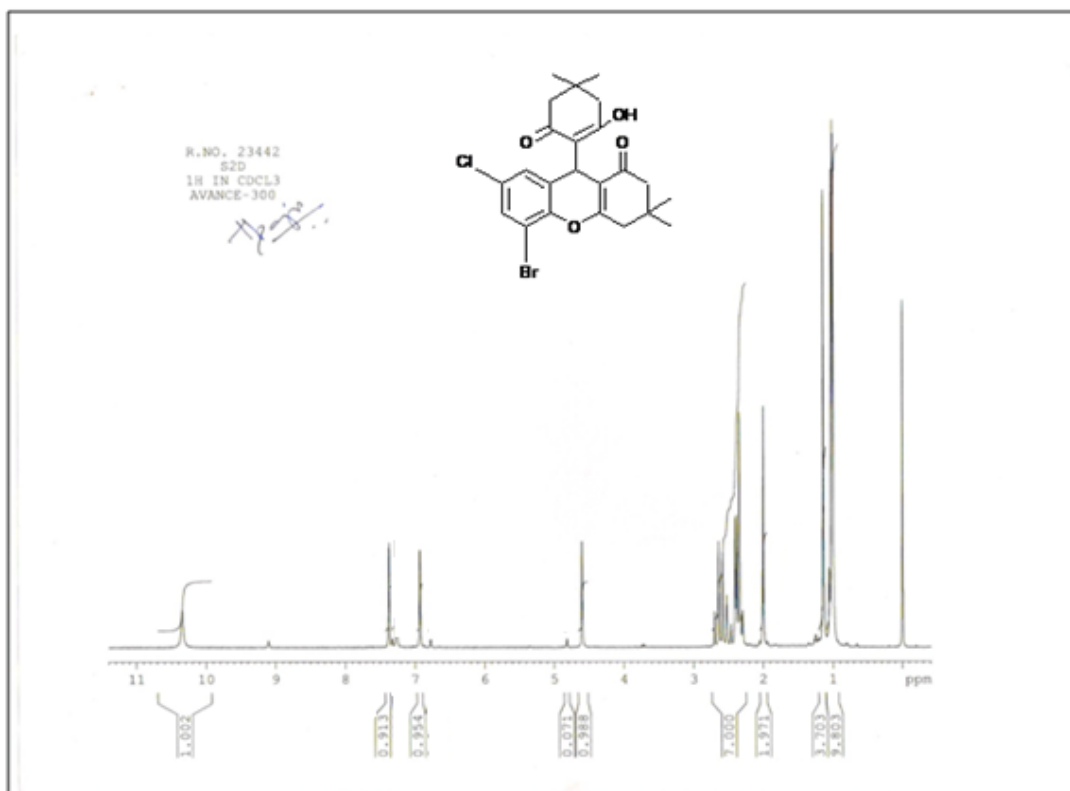

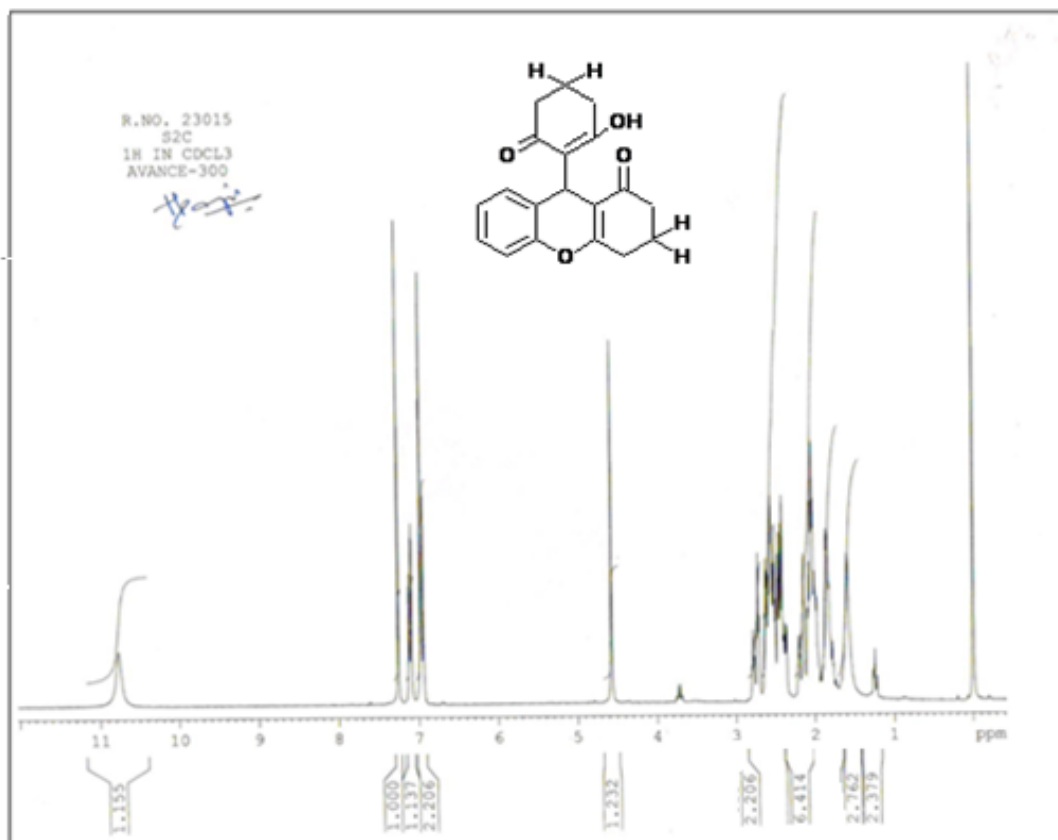

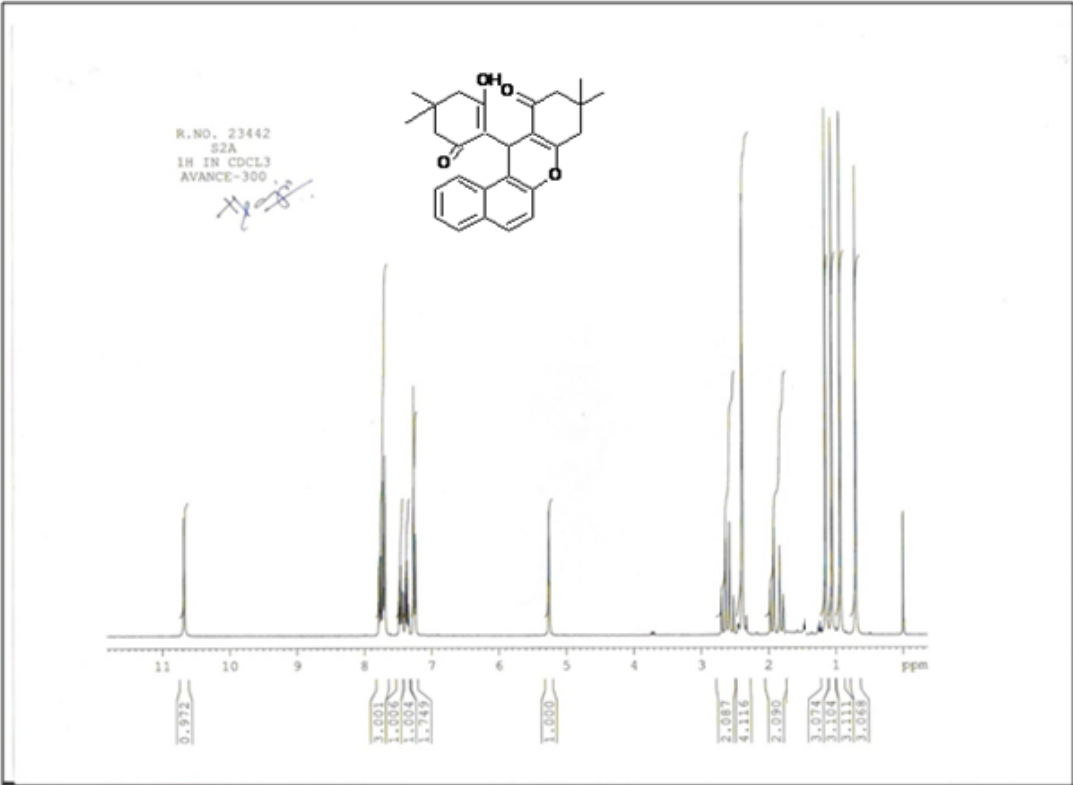

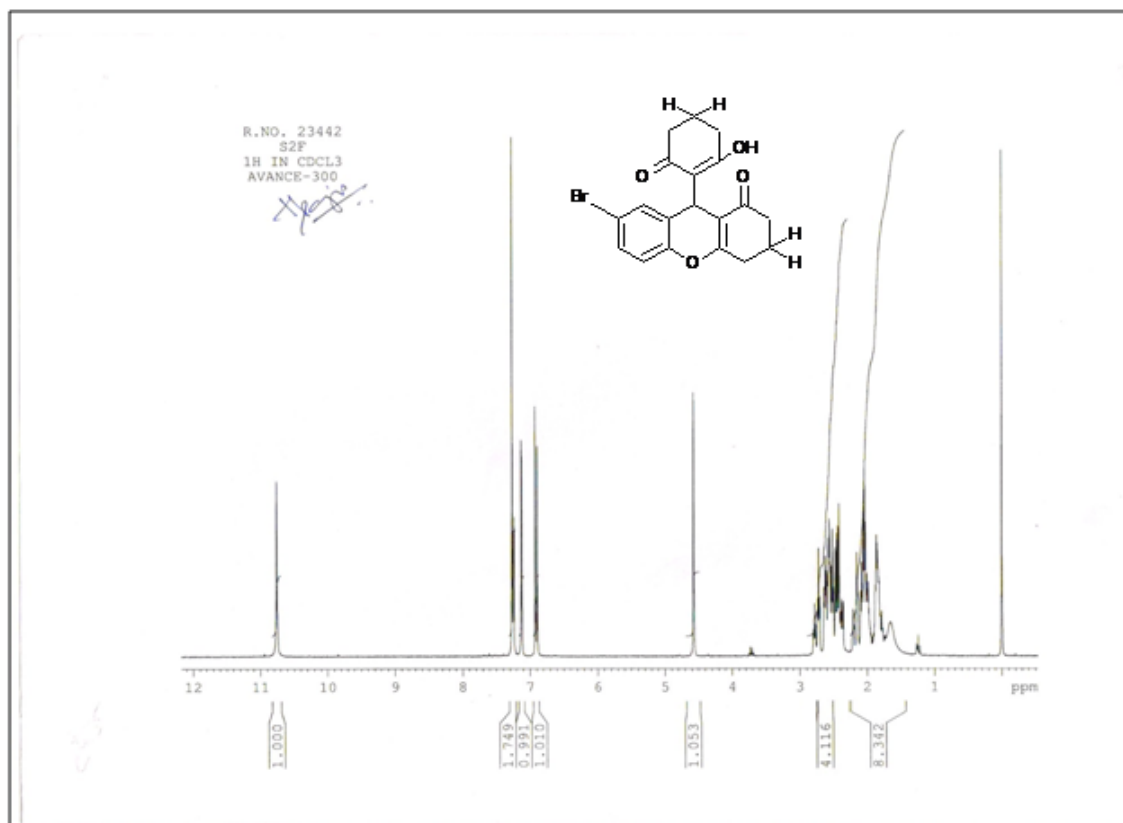

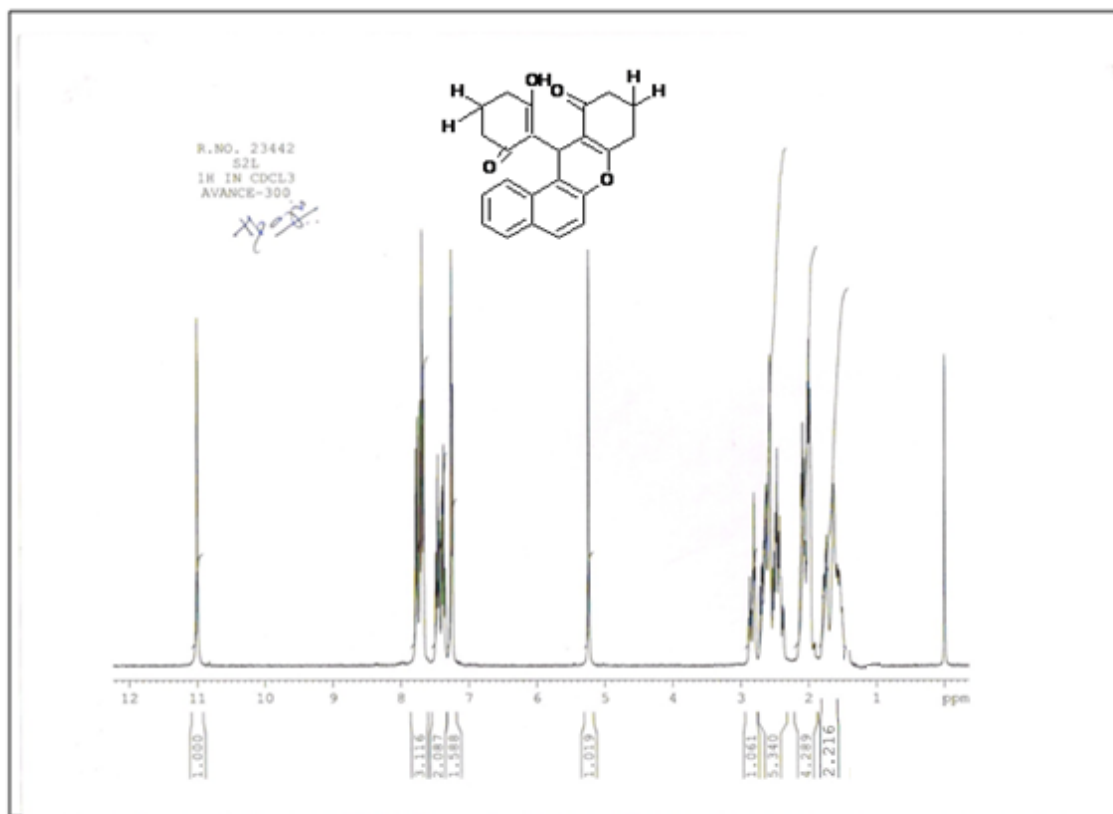

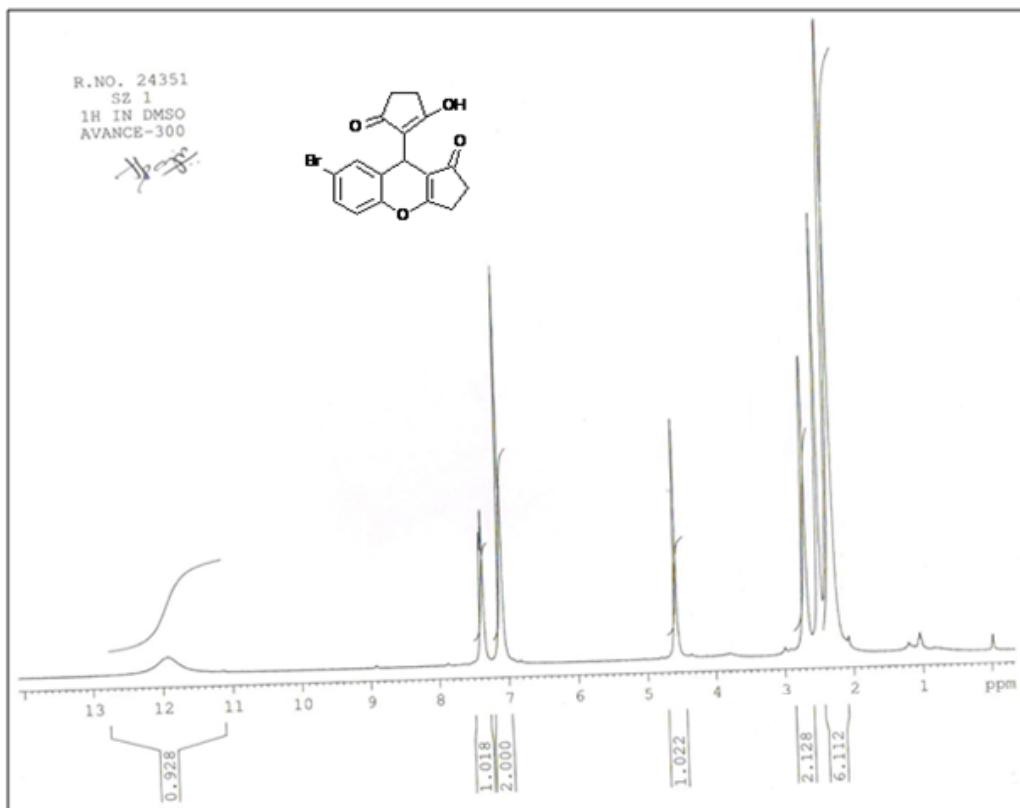

S24-

R.NO. 23015  
S2A  
13C IN CDCL3  
AVANCE-300

*Handwritten signature*

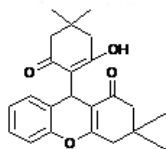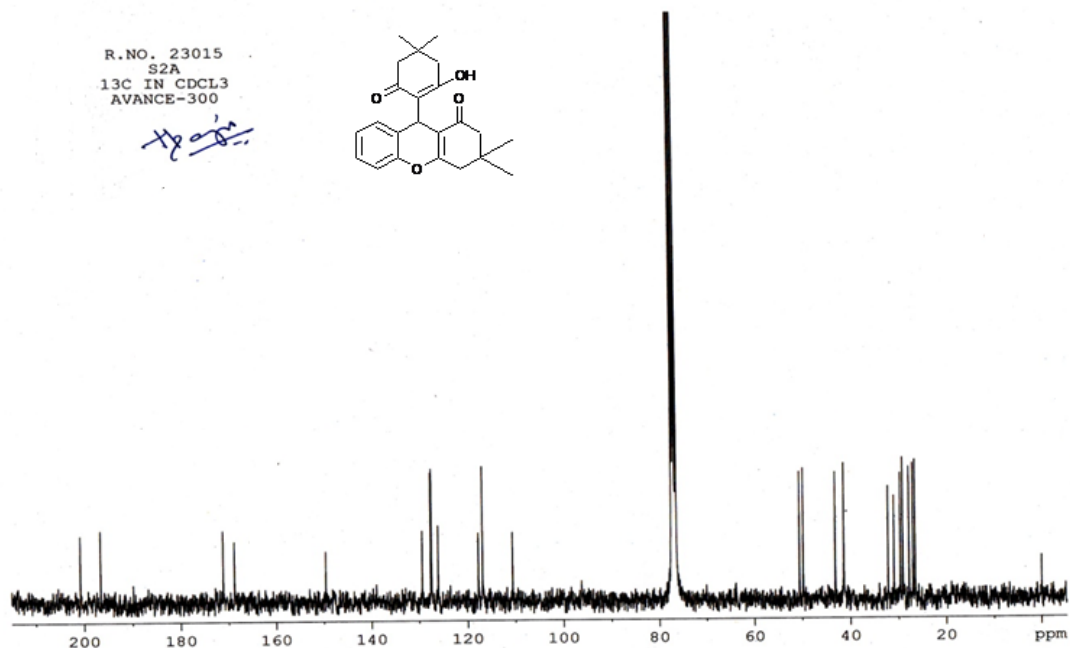



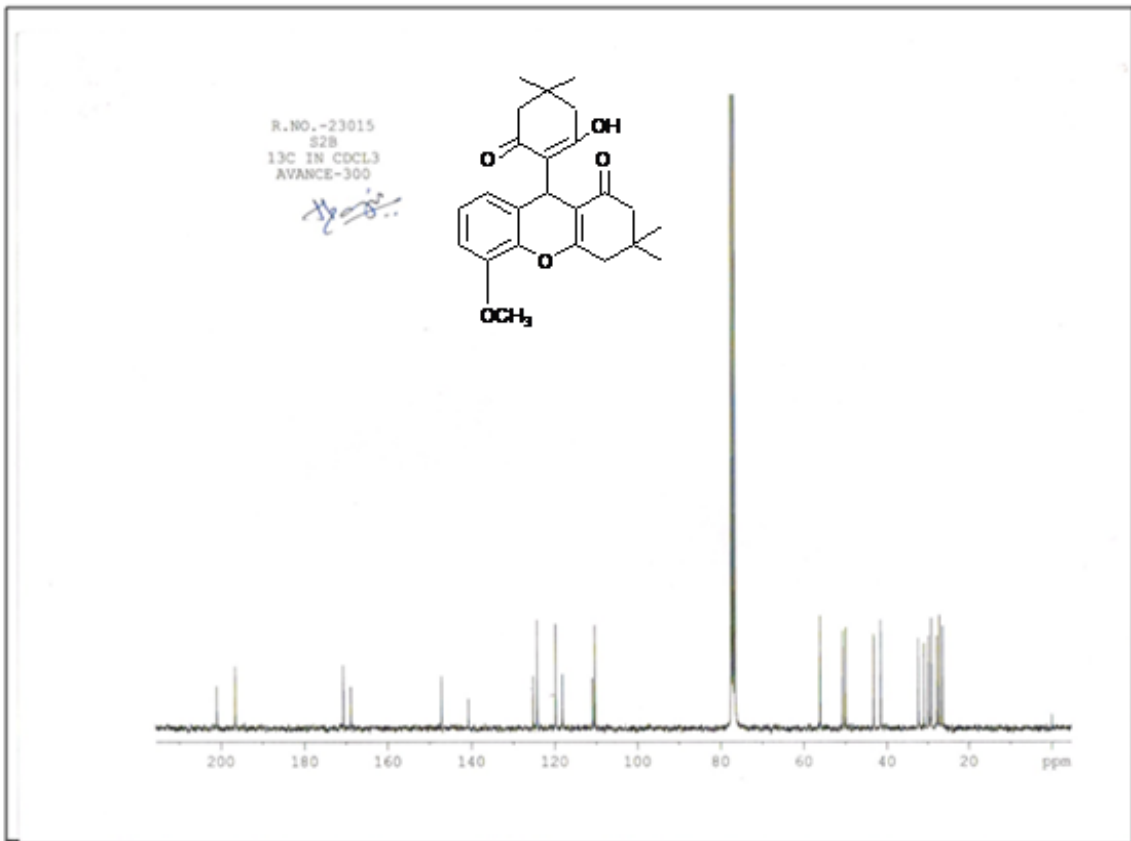

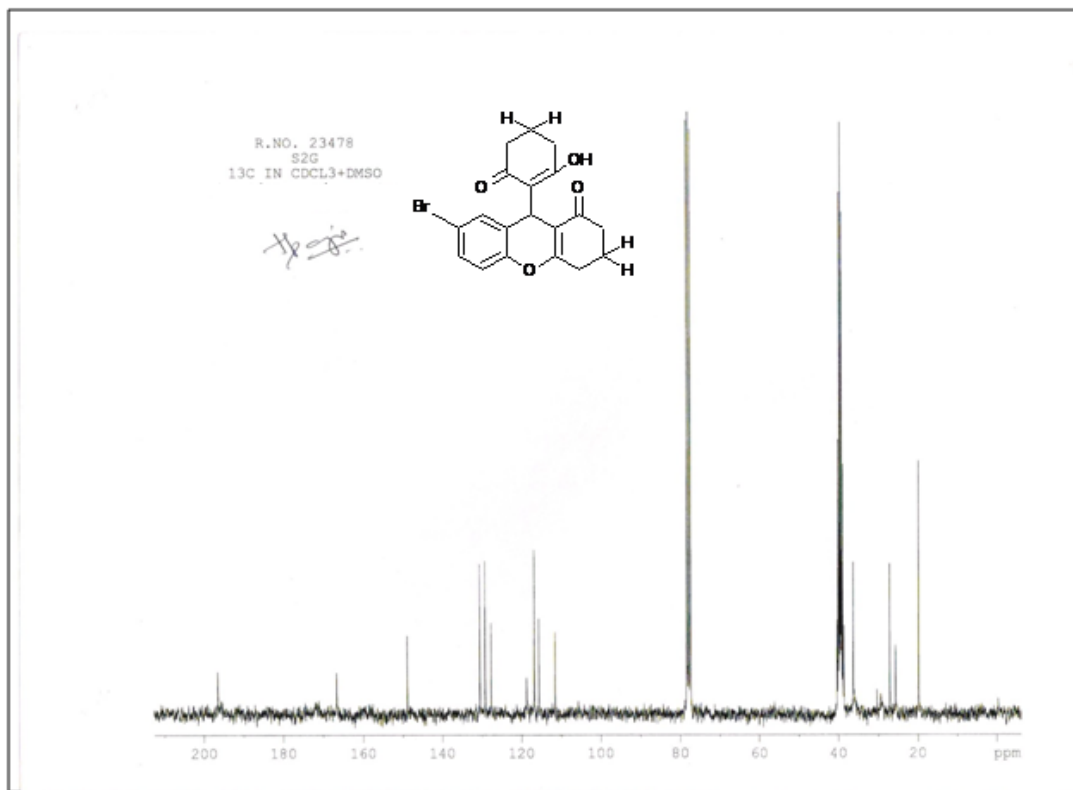

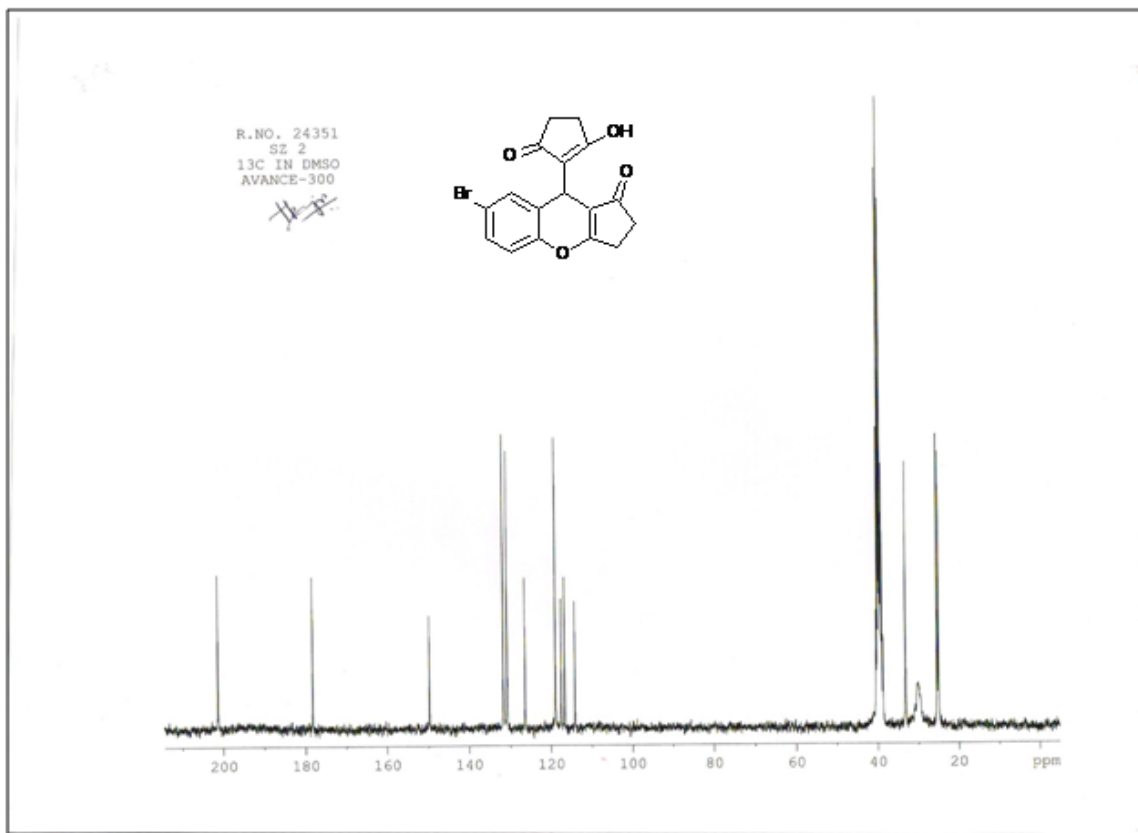

R.NO. 23478  
S21  
13C IN CDCL3+DMSO

*Handwritten signature*

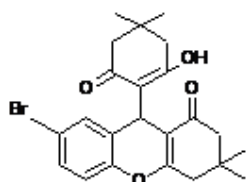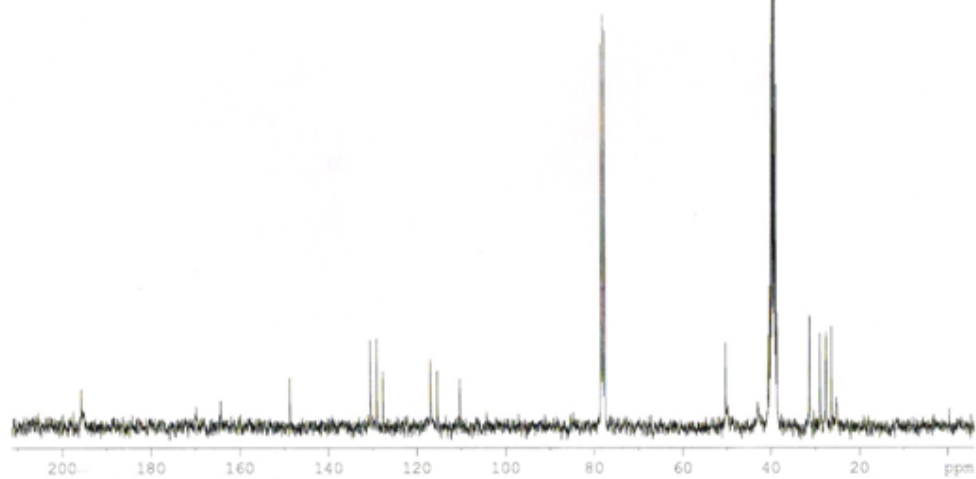

**Determination of Critical micellar concentration (CMC) of lemon extract by conductivity method**

-S30-

To maintain better lemon extract:water composition i.e above CMC for this protocol, we employed electrical conductivity method to determine the critical micelle concentration (CMC) of reaction medium. The conductivity experiments were carried using Equiptronics (Model EQ-664 A) digital auto ranging conductivity meter. Different composition of solutions of Lemon extract was prepared in deionized water having specific conductance  $7.0 \mu\text{S cm}^{-1}$ . A step-by step dilution method was adopted for the measurements of specific conductance of the various compositions to avoid dilution error. The conductance was plotted as a function of percentage composition of lemon extract:water (v/v) and the inflection point gives the value (40 %) of CMC which is indicated in the figure.

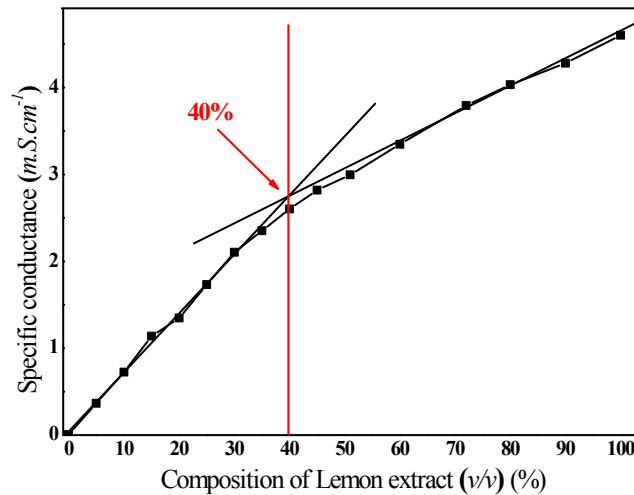

-S31-
